# Supplementary material
Source: PubMed Central journal article supplement (PMC5388387)

SupplementalFigure for:  
Intratumoral Heterogeneity in Breast Cancer – Comparison of Primary and Metastatic Breast Cancers  
Gary Tse et al.

**Figure S1 Schematic representation of the two level of heterogeneity**

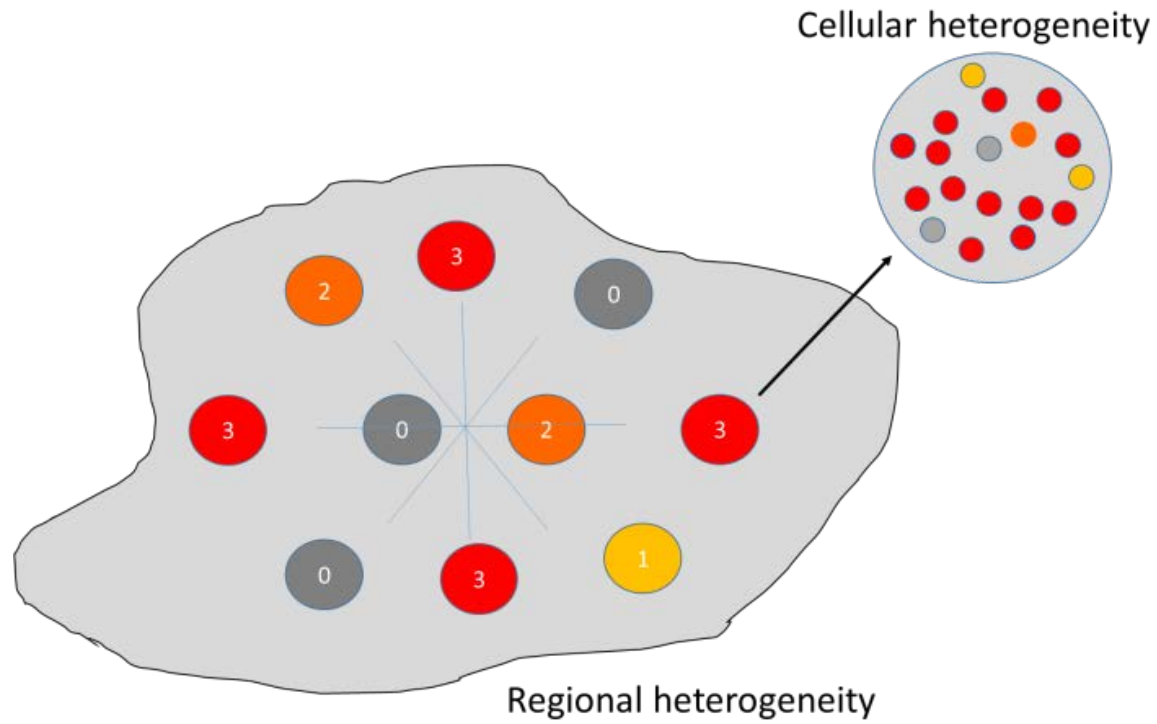

Supplement: supp_the2016-0352_onco12093-sup-0002-suppinfo2.pdf [file supp_the2016-0352_onco12093-sup-0002-suppinfo2.pdf]
