# Supplementary material
Source: PubMed Central journal article supplement (PMC5388387)
Supplement: supp_the2016-0352_onco12093-sup-0003-suppinfo3.pdf [file supp_the2016-0352_onco12093-sup-0003-suppinfo3.pdf]

Supplemental Table for:  
Intratumoral Heterogeneity in Breast Cancer – Comparison of Primary and Metastatic Breast Cancers  
Gary Tse et al.

**Table S1 Relationship of  $QE_{reg}$  and  $QE_{cell}$  for different markers**

|                              |         | $QE_{cell}$ |    |       |      |
|------------------------------|---------|-------------|----|-------|------|
| <b><math>QE_{reg}</math></b> |         | HER2        | ER | PR    | Ki67 |
| <b>Overall</b>               | $r_s$   | 0.872       |    | 0.607 |      |
|                              | P-value | <0.001      | ns | 0.013 | ns   |
| <b>Primary tumor</b>         | $r_s$   | 0.823       |    |       |      |
|                              | P-value | 0.023       | ns | ns    | ns   |
| <b>Metastatic tumor</b>      | $r_s$   | 0.880       |    | 0.743 |      |
|                              | P-value | 0.002       | ns | 0.022 | ns   |
| <b>Staining score 0</b>      | $r_s$   | 0.862       |    |       |      |
|                              | P-value | 0.001       | ns | ns    | -    |
| <b>Staining score 1</b>      | $r_s$   |             |    |       |      |
|                              | P-value | ns          | ns | ns    | ns   |
| <b>Staining score 2</b>      | $r_s$   |             |    |       |      |
|                              | P-value | ns          | -  | -     | ns   |
| <b>Staining score 3</b>      | $R_s$   |             |    |       |      |
|                              | P-value | -           | ns | ns    | ns   |
